# Supplementary material for: Accelerated knowledge discovery from omics data by optimal experimental design
Source: PubMed Central journal article supplement (PMC7538421; doi:10.1038/s41467-020-18785-y), 2020-10-06
Supplement: 41467_2020_18785_MOESM4_ESM.pdf [file 41467_2020_18785_MOESM4_ESM.pdf]

**Title:** Supplementary Data 1:

**Description:** The gene expression profiles of E. coli under the 45 different culture conditions. 40 of the 45 conditions have a biocide and an antibiotic. The remaining 5 conditions include one control sample and 4 antibiotic-only samples.

**Title:** Supplementary Data 2:

**Description:** The synthetic datasets used for evaluating how OPEX is robust to noise, batch size and dataset heterogeneity.
